# Supplementary material for: The Diagnostic Performance of a Clinical Diagnosis of Diabetic Kidney Disease
Source: MDPI journal article supplement (doi:10.3390/life13071492), 2023-06-30
Supplement: s1 [file s1]

**Supplementary Table S1: Listed indications for biopsy and biopsy diagnoses at individual patient level.**

| Patient | Gender | Age (y) | DM Treatment | eGFR | Proteinuria category | RAAS blocker therapy | Clinical diagnosis includes DKD? | Indication for biopsy                                                               | DKD present on biopsy | Other diagnoses present on biopsy |
|---------|--------|---------|--------------|------|----------------------|----------------------|----------------------------------|-------------------------------------------------------------------------------------|-----------------------|-----------------------------------|
| 1       | F      | 74.7    | I            | 33   | 4                    | Y                    | Y                                | 11g proteinuria/24h. Negative vasculitis screen. Coexisting membranous nephropathy? | Y                     | Nil                               |
| 2       | M      | 49.8    | I            | 29   | 3                    | Y                    | Y                                | More rapid than expected decline in GFR. Microscopic haematuria. Coexisting GN?     | Y                     | Nil                               |
| 3       | F      | 60.4    | I            | 17   | 2                    | Y                    | Y                                | Rapidly decreasing renal function in a diabetic with microalbuminuria only.         | Y                     | Nil                               |
| 4       | M      | 70.3    | I            | 42   | 4                    | Y                    | Y                                | Nephrotic syndrome.                                                                 | Y                     | Nil                               |
| 5       | F      | 61.8    | I            | 61   | 3                    | Y                    | Y                                | Worsening proteinuria and kidney function in patient with DM 1.                     | Y                     | Nil                               |
| 6       | M      | 31.0    | I            | 14   | 4                    | Y                    | Y                                | Nephrotic syndrome.                                                                 | Y                     | Nil                               |
| 7       | M      | 43.4    | I            | 47   | 4                    | Y                    | Y                                | HT and DM. Microscopic haematuria. Nephrotic proteinuria.                           | Y                     | Nil                               |
| 8       | M      | 51.6    | O            | 38   | 3                    | Y                    | Y                                | Worsening proteinuria. Microscopic haematuria. Only DKD present?                    | Y                     | Nil                               |
| 9       | M      | 64.6    | I            | 31   | 3                    | Y                    | Y                                | Worsening proteinuria. Worsening kidney function. Only DKD present?                 | Y                     | Nil                               |
| 10      | F      | 27.4    | I            | 31   | 4                    | Y                    | Y                                | Nephrotic proteinuria. Microscopic haematuria.                                      | Y                     | Nil                               |

|    |   |      |   |     |   |   |   |                                                                                                                 |   |     |
|----|---|------|---|-----|---|---|---|-----------------------------------------------------------------------------------------------------------------|---|-----|
| 11 | M | 59.2 | I | 41  | 4 | Y | Y | Worsening kidney function in diabetic with proteinuria and also microscopic haematuria.                         | Y | Nil |
| 12 | F | 41.5 | I | 45  | 4 | Y | Y | Severely nephrotic with >10g proteinuria/24h.<br>Type 1 DM.<br>Low titre ANA.<br>Only DKD?                      | Y | Nil |
| 13 | M | 65.7 | D | 50  | 1 | Y | Y | Development of new nephrotic syndrome with microscopic haematuria.                                              | Y | Nil |
| 14 | M | 51.8 | I | 8   | 4 | Y | Y | Rapid decline in kidney function in diabetic with nephrotic proteinuria.<br>Exclude superimposed GN.            | Y | Nil |
| 15 | F | 47.1 | I | 30  | 4 | Y | Y | Recent onset nephrotic syndrome.<br>Rapid decline in kidney function.<br>Exclude superimposed GN.               | Y | Nil |
| 16 | M | 52.0 | O | 103 | 3 | Y | Y | DM only recently diagnosed.<br>Proteinuria and kidney function worse than expected.<br>Exclude other pathology. | Y | Nil |
| 17 | F | 64.9 | I | 28  | 4 | Y | Y | 13g proteinuria/24h.<br>Exclude co-existing membranous nephropathy.                                             | Y | Nil |
| 18 | F | 58.2 | O | 25  | 4 | Y | Y | DM2 with nephrotic proteinuria.<br>Obese.<br>Exclude co-existing FSGS.                                          | Y | Nil |
| 19 | M | 67.7 | I | 22  | 4 | Y | Y | Nephrotic syndrome.                                                                                             | Y | Nil |

|    |   |      |   |    |   |   |   |                                                                                                                                                  |   |                              |
|----|---|------|---|----|---|---|---|--------------------------------------------------------------------------------------------------------------------------------------------------|---|------------------------------|
|    |   |      |   |    |   |   |   | Microscopic haematuria.<br>Positive ANA (negative<br>dsDNA and ENA, normal<br>Complement)<br>Exclude co-existing GN.                             |   |                              |
| 20 | M | 61.5 | I | 37 | 3 | Y | Y | Recent onset nephrotic<br>range proteinuria despite<br>good DM control.                                                                          | Y | Nil                          |
| 21 | F | 58.4 | I | 29 | 4 | Y | Y | Nephrotic syndrome.<br>Impaired kidney function.<br>Microscopic haematuria.<br>Positive ANA (1:160).                                             | Y | Nil                          |
| 22 | F | 49.6 | I | 19 | 4 | Y | Y | DM 1.<br>Nephrotic proteinuria.<br>Impaired kidney function.<br>Microscopic haematuria.<br>Exclude co-existing GN.                               | Y | Nil                          |
| 23 | F | 48.4 | I | 77 | 4 | Y | Y | DM2.<br>Hypopituitarism.<br>Nephrotic range proteinuria.<br>Obese.<br>Superimposed FSGS?                                                         | Y | Nil                          |
| 24 | F | 75.9 | O | 20 | 3 | Y | Y | Worsening kidney function.<br>Worsening proteinuria.<br>Only DKD?                                                                                | Y | Nil                          |
| 25 | F | 50.7 | O | 31 | 4 | Y | Y | DM2 with family history.<br>Nephrotic range proteinuria.<br>Microscopic haematuria.<br>Positive MPO-ANCA.<br>DKD or microscopic<br>polyangiitis? | Y | Microscopic<br>polyangiitis. |
| 26 | M | 59.7 | I | 55 | 4 | Y | Y | DM2.<br>Nephrotic proteinuria.                                                                                                                   | Y | FSGS<br>(secondary).         |

|    |   |      |   |     |   |   |   |                                                                                                                                                     |   |                                     |
|----|---|------|---|-----|---|---|---|-----------------------------------------------------------------------------------------------------------------------------------------------------|---|-------------------------------------|
|    |   |      |   |     |   |   |   | Microscopic haematuria.                                                                                                                             |   |                                     |
| 27 | M | 61.4 | O | 40  | 4 | Y | Y | Poorly controlled DM2.<br>Nephrotic proteinuria.<br>Low level serum paraprotein.<br>Normal serum free light chain ratio.<br>No Bence Jones protein. | Y | FSGS (secondary).                   |
| 28 | M | 56.7 | I | 35  | 4 | Y | Y | DM2.<br>Rheumatoid arthritis.<br>Nephrotic range proteinuria.<br>Impaired kidney function.<br>Superimposed amyloid?                                 | Y | FSGS (secondary).                   |
| 29 | F | 52.2 | O | 101 | 4 | Y | Y | Nephrotic range proteinuria.<br>Microscopic haematuria.<br>Co-existing GN?                                                                          | Y | IgA nephropathy.                    |
| 30 | M | 55.7 | O | 69  | 3 | Y | N | Non-nephrotic proteinuria.<br>Microscopic haematuria.<br>GN more likely?                                                                            | Y | Light chain deposition disease.     |
| 31 | F | 43.5 | I | 64  | 4 | Y | Y | SLE with low complement and raised dsDNA.<br>Newly positive lupus anticoagulant.<br>Grade of lupus nephritis?                                       | Y | Lupus nephritis (ISN/RPN Class III) |
| 32 | F | 67.5 | O | 45  | 3 | Y | Y | DM2 but also Sjogren's.<br>Recent worsening of kidney function.<br>Any involvement from Sjogren's?                                                  | Y | Sjogren's syndrome.                 |
| 33 | F | 48.8 | I | 55  | 3 | Y | Y | DM1.<br>Hepatitis C.<br>Proteinuria.<br>Microscopic haematuria.<br>Co-existing MPGN?                                                                | Y | FSGS (secondary).                   |

|    |   |      |   |     |   |   |   |                                                                                                                                                       |   |                                                                 |
|----|---|------|---|-----|---|---|---|-------------------------------------------------------------------------------------------------------------------------------------------------------|---|-----------------------------------------------------------------|
| 34 | M | 51.3 | I | 27  | 4 | Y | Y | Proteinuria.<br>Impaired kidney function.<br>Microscopic haematuria.<br>Co-existing GN?                                                               | Y | MCGN (MPGN)<br>type 1.                                          |
| 35 | F | 40.7 | I | 30  | 4 | Y | Y | Poorly controlled DM1.<br>Nephrotic proteinuria.                                                                                                      | Y | FSGS<br>(secondary).                                            |
| 36 | M | 58.5 | O | 101 | 3 | Y | Y | DM2.<br>Hypertension.<br>Proteinuria.<br>Normal kidney function.                                                                                      | Y | HT.                                                             |
| 37 | F | 55.2 | I | 9   | 2 | N | Y | Acute deterioration in kidney<br>function.<br>DM2 (>5y).<br>Obese.<br>Microalbuminuria only.<br>Raised MPO-ANCA.<br>Microscopic polyangiitis<br>only? | Y | ANCA associated<br>vasculitis<br>(Microscopic<br>polyangiitis). |
| 38 | F | 48.1 | I | 34  | 4 | Y | Y | DM2.<br>Nephrotic proteinuria.<br>No other micro- or macro-<br>vascular complications.                                                                | Y | IgA nephropathy.                                                |
| 39 | F | 61.9 | I | 39  | 4 | Y | Y | DM2.<br>Obese.<br>Proteinuria.<br>Impaired kidney function.<br>Anaemic.                                                                               | N | IgA nephropathy.                                                |
| 40 | M | 76.0 | D | 31  | 2 | N | Y | Acute on chronic kidney<br>disease.<br>DM2 on diet only.<br>Minimal proteinuria.                                                                      | N | Ischaemic<br>nephrosclerosis.                                   |
| 41 | F | 70.8 | O | 50  | 3 | Y | Y | Acute decline in function.<br>DM2.                                                                                                                    | N | Acute tubular<br>necrosis (ATN)                                 |

|    |   |      |   |    |   |   |   |                                                                                                                                                    |   |                                  |
|----|---|------|---|----|---|---|---|----------------------------------------------------------------------------------------------------------------------------------------------------|---|----------------------------------|
|    |   |      |   |    |   |   |   | Proteinuria.                                                                                                                                       |   |                                  |
| 42 | F | 47.6 | O | 97 | 3 | Y | N | Proteinuria <1g/day.<br>Strong positive ANA but<br>dsDNA and ENA negative,<br>Complement normal.                                                   | N | FSGS                             |
| 43 | F | 73.5 | O | 90 | 3 | Y | N | Proteinuria >2g/day.<br>Microscopic haematuria.                                                                                                    | N | MCGN (MPGN)<br>type unspecified. |
| 44 | F | 65.1 | D | 42 | 3 | Y | Y | AKI.<br>Recent antibiotic therapy<br>(Co-Amoxyclav).<br>Interstitial nephritis?                                                                    | N | ATN.                             |
| 45 | F | 78.3 | O | 41 | 1 | Y | Y | AKI but slow to recover.<br>Eosinophils in urine.<br>Interstitial nephritis?                                                                       | N | ATN.                             |
| 46 | M | 59.8 | I | 90 | 3 | Y | N | Proteinuria.<br>Microscopic haematuria.<br>Negative vasculitis screen.                                                                             | N | FSGS.                            |
| 47 | M | 46.4 | O | 57 | 3 | Y | N | Proteinuria.<br>CKD 3.<br>Family history of kidney<br>failure.                                                                                     | N | IgA nephropathy.                 |
| 48 | M | 73.0 | I | 38 | 2 | Y | N | AKI and acute liver injury<br>following IV antibiotic<br>therapy.<br>Widespread maculopapular<br>rash.<br>Eosinophilia.<br>Interstitial nephritis? | N | Acute interstitial<br>nephritis. |
| 49 | F | 63.3 | O | 35 | 3 | Y | N | Myeloma, any renal<br>involvement?                                                                                                                 | N | Myeloma.                         |
| 50 | M | 73.7 | I | 20 | 4 | Y | N | Rapidly deteriorating kidney<br>function.<br>Nephrotic proteinuria.                                                                                | N | FSGS<br>(Secondary).             |

|    |   |      |   |    |   |   |   |                                                                                                                       |   |                                                   |
|----|---|------|---|----|---|---|---|-----------------------------------------------------------------------------------------------------------------------|---|---------------------------------------------------|
|    |   |      |   |    |   |   |   | New microscopic haematuria.<br>GN?                                                                                    |   |                                                   |
| 51 | M | 54.3 | I | 24 | 3 | N | N | Rapidly deteriorating kidney function.<br>High anti-streptolysin O titre despite no preceding streptococcal infection | N | Anti GBM disease.                                 |
| 52 | M | 65.8 | O | 91 | 3 | Y | Y | DM.<br>Hypertension.<br>Obese.<br>Proteinuria.<br>DKD v FSGS?                                                         | N | Hypertensive nephrosclerosis.<br>FSGS.            |
| 53 | M | 70.5 | O | 43 | 1 | Y | N | CKD.<br>Known CLL.<br>Any kidney involvement?                                                                         | N | Ischaemic nephrosclerosis.<br>No CLL involvement. |
| 54 | M | 74.2 | D | 40 | 1 | Y | N | Worsening kidney function.<br>No proteinuria.<br>Known urothelial cancer.<br>Cause for decline?                       | N | HT.                                               |

AKI acute kidney injury, ANA antinuclear antibodies, ATN acute tubular necrosis, CKD chronic kidney disease, CLL chronic lymphocytic leukaemia, DKD diabetic kidney disease, DM (1 or 2) diabetes mellitus (types 1 or 2), dsDNA double stranded DNA antibodies, ENA extractable nuclear antigen antibodies, FSGS focal segmental glomerulosclerosis, HT hypertension, MCGN mesangiocapillary GN (MPGN membranoproliferative GN)
